# Supplementary material for: Three-Dimensional Printed Patient-Specific Vestibular Augmentation: A Case Report
Source: MDPI journal article supplement (doi:10.3390/jcm13082408), 2024-04-20
Supplement: s1 [file s1]

SUPPLEMENTARY INFORMATION

Case Report

# Three-Dimensional Printed Patient-Specific Vestibular Augmentation: A Case Report

Linh Johansson <sup>1,2,3,4,5</sup>, Jose Luis Latorre <sup>6</sup>, Margaux Liversain <sup>5</sup>, Emilie Thorel <sup>5</sup>, Yago Raymond <sup>5</sup>  
and Maria-Pau Ginebra <sup>1,2,3,7,8,\*</sup>

## Insertion torque

Position # 12

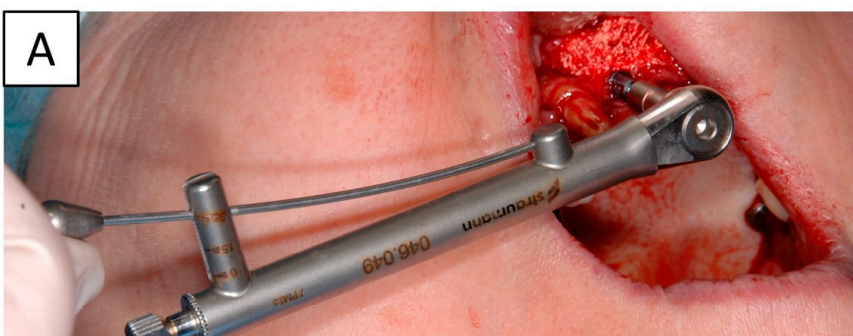

Position # 22

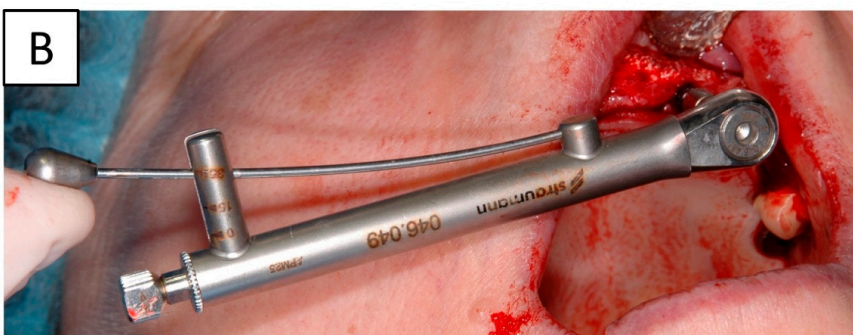

**Citation:** Johansson, L.; Latorre, J.L.; Liversain, M.; Thorel, E.; Raymond, Y.; Ginebra, M.-P. Three-Dimensional Printed Patient-Specific Vestibular Augmentation: A Case Report. *J. Clin. Med.* **2024**, *13*, 2408. <https://doi.org/10.3390/jcm13082408>

Academic Editors: Giovanni Salzano and Luis M. Junquera

Received: 17 March 2024

Revised: 10 April 2024

Accepted: 16 April 2024

Published: 20 April 2024

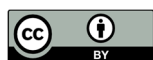

**Copyright:** © 2024 by the authors. Licensee MDPI, Basel, Switzerland. This article is an open access article distributed under the terms and conditions of the Creative Commons Attribution (CC BY) license (<https://creativecommons.org/licenses/by/4.0/>).

**Figure S1.** Showing the insertion torque of the two dental implants during placement. (A) Position # 12; (B) Position # 22. Both dental implants had an insertion torque over 35 N.cm.
